# Supplementary material for: Tipping the Balance: Robustness of Tip Cell Selection, Migration and Fusion in Angiogenesis
Source: PLOS journal article supplement (doi:10.1371/journal.pcbi.1000549), 2009-10-29
Supplement: S8 (10.1371/journal.pcbi.1000549.s008) [file journal.pcbi.1000549.s008]

301 Moved Permanently

# Moved Permanently

The document has moved here.

---

Apache Server at www.ploscompbiol.org Port 80
